# Supplementary material
Source: ML conference proceedings conference paper supplement (https://openreview.net/forum?id=Bw82hwg5Q3)
Supplement: supplementary_material [file attachment]

[Q<sub>4</sub>] Is Freya a combination of Athena and Aphrodite?

[Ground-Truth  $a_4^*$ ] yes

[Explanation] Athena was the Greek goddess of war. Aphrodite was the Greek goddess of love. Freya was the Norse goddess of war, love, and fertility.

[Predicted  $a_{42}$ ] yes

[R<sub>42</sub>] in Chain-of-Thought

Freya is the goddess of love, beauty and fertility.

|               |                 |                                                                                                                                                                                                                                                               |
|---------------|-----------------|---------------------------------------------------------------------------------------------------------------------------------------------------------------------------------------------------------------------------------------------------------------|
| $\mathcal{E}$ | $\mathcal{C}$   | correct                                                                                                                                                                                                                                                       |
| $\mathcal{S}$ | $\mathcal{S}_1$ | Freya indeed is associated with love, beauty, and fertility in Norse mythology. However, it is important to note that while the comparison to Athena and Aphrodite is understandable, it is <u>not a direct or complete equivalence</u> .                     |
|               | $\mathcal{S}_2$ | The statement correctly identifies Freya. However, the statement <u>does not mention that</u> Freya is a Norse goddess, which could slightly impact the understanding of the comparison to Greek goddesses Athena and Aphrodite.                              |
|               | $\mathcal{S}_3$ | The statement is mostly correct as Freya is indeed a goddess associated with love, beauty, and fertility. However, it might be worth mentioning that she is a Norse goddess, while Athena and Aphrodite are Greek goddesses, <u>to provide more context</u> . |

You can compare these to the Greek gods Athena and Aphrodite.

|               |                 |                                                                                                                                                                                                                                                                                                                                                                                          |
|---------------|-----------------|------------------------------------------------------------------------------------------------------------------------------------------------------------------------------------------------------------------------------------------------------------------------------------------------------------------------------------------------------------------------------------------|
| $\mathcal{E}$ | $\mathcal{C}$   | correct                                                                                                                                                                                                                                                                                                                                                                                  |
| $\mathcal{S}$ | $\mathcal{S}_1$ | It is true that Freya can be compared to the Greek gods Athena and Aphrodite in terms of their respective domains. However, the comparison is not entirely accurate as Freya comes from Norse mythology, and the attributes of the gods may not be an exact match. <u>The comparison is a simplification</u> , which is why the probability is not higher.                               |
|               | $\mathcal{S}_2$ | The statement establishes a comparison between Freya and the Greek goddesses Athena and Aphrodite. While this step of reasoning is generally correct, it could be improved by specifically mentioning that Freya is a Norse goddess and by <u>providing more information about the roles and attributes of Athena and Aphrodite for a clearer comparison</u> .                           |
|               | $\mathcal{S}_3$ | While it is true that Freya shares some similarities with Athena and Aphrodite, the comparison is not entirely accurate. Freya is a Norse goddess, while Athena and Aphrodite are Greek goddesses. The comparison is correct in the sense that they share some domains, but it might be <u>misleading</u> to suggest that Freya is a <u>direct</u> "combination" of these two goddesses. |

It is not clear how their powers exactly compare.

|               |                 |                                                                                                                                                                                                                                                                                                                                                                                                                                                                 |
|---------------|-----------------|-----------------------------------------------------------------------------------------------------------------------------------------------------------------------------------------------------------------------------------------------------------------------------------------------------------------------------------------------------------------------------------------------------------------------------------------------------------------|
| $\mathcal{E}$ | $\mathcal{C}$   | correct                                                                                                                                                                                                                                                                                                                                                                                                                                                         |
| $\mathcal{S}$ | $\mathcal{S}_1$ | This step of reasoning acknowledges that it is not entirely clear how the powers of Freya, Athena, and Aphrodite compare. Although there are some similarities, the differences between Norse and Greek mythologies make it difficult to determine whether Freya is a direct combination of Athena and Aphrodite. <u>The high probability reflects the acknowledgment of the uncertainty in comparing the powers of the gods across different mythologies</u> . |
|               | $\mathcal{S}_2$ | The statement acknowledges that it is not clear how the powers of Freya, Athena, and Aphrodite exactly compare. However, the question asks if Freya is a combination of Athena and Aphrodite, which implies a synthesis or blending of their roles or attributes. The reasoning could be improved by <u>specifically mentioning the roles and attributes of Athena and Aphrodite, and whether or not they overlap with Freya's roles and attributes</u> .       |
|               | $\mathcal{S}_3$ | The reasoning here is more accurate, acknowledging that while there are similarities between Freya and Athena and Aphrodite, it is not clear how their powers exactly compare. It is important to consider that Freya is a Norse goddess and Athena and Aphrodite are Greek goddesses, so <u>their roles, domains, and characteristics may not be directly comparable</u> .                                                                                     |

However, it seems that Freya must have attributes that match both.

|               |                 |                                                                                                                                                                                                                                                                                                                                                                                                                                                                                                            |
|---------------|-----------------|------------------------------------------------------------------------------------------------------------------------------------------------------------------------------------------------------------------------------------------------------------------------------------------------------------------------------------------------------------------------------------------------------------------------------------------------------------------------------------------------------------|
| $\mathcal{E}$ | $\mathcal{C}$   | correct                                                                                                                                                                                                                                                                                                                                                                                                                                                                                                    |
| $\mathcal{S}$ | $\mathcal{S}_1$ | incorrect because <u>it assumes that Freya must have attributes</u> that match both Athena and Aphrodite. While there may be some similarities in their attributes, it is not appropriate to conclude that Freya is a combination of the two Greek goddesses. Norse and Greek mythologies are distinct, and the deities in these pantheons may have different origins and roles.                                                                                                                           |
|               | $\mathcal{S}_2$ | The statement acknowledges that Freya has attributes that match both Athena and Aphrodite. However, it would be more accurate to <u>discuss the specific attributes</u> of Athena and Aphrodite to determine the extent of the similarities.                                                                                                                                                                                                                                                               |
|               | $\mathcal{S}_3$ | It assumes that Freya must have attributes that match both Athena and Aphrodite, but this may not be the case. While there are similarities between these goddesses, they are from different mythologies (Freya – Norse, Athena & Aphrodite – Greek), and their roles, domains, and characteristics may not be directly comparable or combined. <u>It is not accurate to assume that Freya is a combination of Athena and Aphrodite without a more in-depth analysis in their respective mythologies</u> . |

So the answer is yes.

|               |                 |                                                                                                                                                                                                                                                                                                                                                                      |
|---------------|-----------------|----------------------------------------------------------------------------------------------------------------------------------------------------------------------------------------------------------------------------------------------------------------------------------------------------------------------------------------------------------------------|
| $\mathcal{E}$ | $\mathcal{C}$   | correct                                                                                                                                                                                                                                                                                                                                                              |
| $\mathcal{S}$ | $\mathcal{S}_1$ | This step of reasoning is incorrect because it is just based on some similarities in their attributes. While there may be some similarities, <u>it is not accurate to say that Freya is a combination of the two Greek goddesses. Norse and Greek mythologies are distinct</u> , and the deities in these pantheons have different origins and roles.                |
|               | $\mathcal{S}_2$ | Although Freya shares some attributes with both Athena and Aphrodite, it is an <u>oversimplification</u> to claim that she is a combination of the two. The <u>question seems to imply</u> that Freya might be <u>a direct mix of the two</u> , but this is not accurate.                                                                                            |
|               | $\mathcal{S}_3$ | The conclusion that Freya is a combination of Athena and Aphrodite is <u>not accurate based on the information provided</u> . While there are similarities between these goddesses, they belong to different mythologies (Freya is Norse, Athena and Aphrodite are Greek), and their roles, domains, and characteristics may not be directly comparable or combined. |
