# Supplementary material
Source: ML conference proceedings conference paper supplement (https://openreview.net/forum?id=Bw82hwg5Q3)
Supplement: supplementary_material [file attachment]

[Q<sub>3</sub>] Did **Columbus** obtain his **funding** from the rulers of the **Portugese** Empire?

[Ground-Truth *a*<sub>3</sub>\*] no

[Explanation] King Ferdinand and Queen Isabella **funded Columbus'** voyage. They were the joint rulers of the **Iberian Peninsula**, which included **Spain** but **excludes Portugal**. King John II of **Portugal** **rejected Columbus'** request for **funding**.

[Predicted *a*<sub>31</sub>] no ✓

[*R*<sub>31</sub>] in Chain-of-Thought

|          |          |          |                                                                             |
|----------|----------|----------|-----------------------------------------------------------------------------|
| <i>C</i> | <i>P</i> | <i>ε</i> | Columbus obtained his funding from the rulers of the <b>Spanish</b> Empire. |
| <i>C</i> | <i>P</i> | <i>ε</i> | Thus, Columbus didn't obtain his funding ... <b>Portugese</b> Empire.       |
| <i>C</i> | <i>P</i> | <i>ε</i> | So the answer is no.                                                        |

[Predicted *a*<sub>32</sub>] no ✓

[*R*<sub>32</sub>] in Chain-of-Thought

|          |          |          |                                                                                    |
|----------|----------|----------|------------------------------------------------------------------------------------|
| <i>C</i> | <i>P</i> | <i>ε</i> | Columbus was <b>Italian</b> and the <b>Portugese</b> Empire was <b>Portugese</b> . |
| <i>C</i> | <i>P</i> | <i>ε</i> | Thus, Columbus didn't obtain funding ... <b>Portugese</b> Empire.                  |
| <i>C</i> | <i>P</i> | <i>ε</i> | So the answer is no.                                                               |

[Q<sub>4</sub>] Is **Freya** a combination of **Athena** and **Aphrodite**?

[Ground-Truth *a*<sub>4</sub>\*] yes

[Explanation] **Athena** was the **Greek** goddess of **war**. **Aphrodite** was the **Greek** goddess of **love**. **Freya** was the **Norse** goddess of **war**, **love**, and **fertility**.

[Predicted *a*<sub>41</sub>] no ✗

[*R*<sub>41</sub>] in Chain-of-Thought

|          |          |          |                                                           |
|----------|----------|----------|-----------------------------------------------------------|
| <i>C</i> | <i>P</i> | <i>ε</i> | Freya is a <b>Norse</b> goddess.                          |
| <i>C</i> | <i>P</i> | <i>ε</i> | Athena and Aphrodite are <b>Greek</b> goddesses.          |
| <i>C</i> | <i>P</i> | <i>ε</i> | Thus, Freya is not a combination of Athena and Aphrodite. |
| <i>C</i> | <i>P</i> | <i>ε</i> | So the answer is no.                                      |

[Predicted *a*<sub>42</sub>] yes ✓

[*R*<sub>42</sub>] in Chain-of-Thought

|          |          |          |                                                                      |
|----------|----------|----------|----------------------------------------------------------------------|
| <i>C</i> | <i>P</i> | <i>ε</i> | Freya is the goddess of love, beauty and fertility.                  |
| <i>C</i> | <i>P</i> | <i>ε</i> | You can compare these to the <b>Greek</b> gods Athena and Aphrodite. |
| <i>C</i> | <i>P</i> | <i>ε</i> | It is not clear how their powers exactly compare.                    |
| <i>C</i> | <i>P</i> | <i>ε</i> | However, it seems that Freya must have attributes that match both.   |
| <i>C</i> | <i>P</i> | <i>ε</i> | So the answer is yes.                                                |
