# Supplementary material
Source: ML conference proceedings conference paper supplement (https://openreview.net/forum?id=Bw82hwg5Q3)
Supplement: supplementary_material [file attachment]

Generation  $LM_g$  Prompt Formulation

Input

Q Roger has 5 tennis balls. He buys 2 more cans of tennis balls. Each can has 3 tennis balls. How many tennis balls does he have now?

A Roger started with 5 tennis balls.  
And 2 cans of 3 tennis balls each is  $2 \times 3 = 6$  tennis balls.  
So he has  $5 + 6 = 11$  tennis balls now.  
So the answer is 11.

Q

The bakers at the Beverly Hills Bakery baked 200 loaves of bread on Monday morning. They sold 83 loaves in the morning and 38 loaves in the afternoon. A grocery store returned 6 unsold loaves. How many loaves of bread did they have left?

A The bakers baked 200 loaves of bread.  
They sold 83 loaves in the morning.  
And they sold 38 loaves in the afternoon.

R

Output

...  
So they sold  $93 + 39 = 132$  loaves in total.  
# Is the above step of reasoning:  
# (A) Correct  
# (B) Incorrect  
# The above step of reasoning is:

(A)

C

Evaluation  $LM_e$  Prompt Formulation

Input

Q Allison brought some CDs online. Each CD cost \$7. There was an additional charge of \$6 per order for shipping costs. The total bill came to \$65. How many CDs did Allison buy?

A  
Let's call the number of CDs bought  $x$ .  
Then the total cost of the CDs is  $7x$ .  
And there was an additional charge of 6 dollars.  
So the total cost of each CD is  $7 + 4 = 11$  dollars.  
Then the total cost of each CD is  $7 + 4 = 11$  dollars.  
So the answer is 5.  
The above step of reasoning is: (A) Correct.

So the total cost of each CD is  $7 + 4 = 11$  dollars.  
# Is the above step of reasoning:  
# (A) Correct  
# (B) Incorrect  
# The above step of reasoning is: (B), because ...

Q The bakers at the Beverly Hills Bakery baked 200 loaves of bread on Monday morning. They sold 83 loaves in the morning and 38 loaves in the afternoon. A grocery store returned 6 unsold loaves. How many loaves of bread did they have left?

A The bakers baked 200 loaves of bread.  
They sold 83 loaves in the morning.  
And they sold 38 loaves in the afternoon.  
So they sold  $83 + 38 = 121$  loaves in total.  
The above step of reasoning is:

Output

(A)
