# Supplementary material
Source: ML conference proceedings conference paper supplement (https://openreview.net/forum?id=Bw82hwg5Q3)
Supplement: supplementary_material [file attachment]

[ $Q_3$ ] Did Columbus obtain his funding from the rulers of the Portugese Empire?  
[Ground-Truth  $a_3^*$ ] no  
[Explanation] King Ferdinand and Queen Isabella funded Columbus' voyage to the New World. King Ferdinand of Argon and Queen Isabella of Castille were the joint rulers of kingdoms of the Iberian Peninsula, which included modern-day Spain but excludes Portugal. King John II of Portugal rejected Columbus' request for funding.

[Predicted  $a_{32}$ ] no  
[ $R_{32}$ ] in Chain-of-Thought

|     |     |            |                                                                                                               |                                                                                                                                                                          |     |
|-----|-----|------------|---------------------------------------------------------------------------------------------------------------|--------------------------------------------------------------------------------------------------------------------------------------------------------------------------|-----|
| $C$ | $P$ | $\epsilon$ | Columbus was Italian and the Portugese Empire was Portugese.                                                  |                                                                                                                                                                          | $S$ |
|     |     |            | Thus, Columbus did not obtain funding from the rulers of the Portugese Empire.                                |                                                                                                                                                                          |     |
| $C$ | $P$ | $\epsilon$ | Columbus was Italian, but he obtained funding from the rulers of the Spanish Empire                           | Columbus being Italian and the Portugese Empire being Portugese does not necessarily mean that Columbus could not obtain funding from the rulers of the Portugese Empire | $S$ |
|     |     |            | So the answer is no.                                                                                          |                                                                                                                                                                          |     |
| $C$ | $P$ | $\epsilon$ | Columbus was Italian, but he obtained funding from the rulers of the Spanish Empire, not the Portugese Empire | although the reasoning in statement 2 is flawed, the final conclusion happens to be correct                                                                              | $S$ |
