# Supplementary material
Source: ML conference proceedings conference paper supplement (https://openreview.net/forum?id=Bw82hwg5Q3)
Supplement: supplementary_material [file attachment]

[ $Q_1$ ] **Grace** weighs 125 pounds. **Alex** weighs 2 pounds less than 4 times what **Grace** weighs. What are their **combined** weights in pounds?

[Ground-Truth  $a_1^*$ ] 623.0

[Predicted  $a_{11}$ ] 623.0 ✓

[ $R_{11}$ ] in Python

|   |   |               |                                     |
|---|---|---------------|-------------------------------------|
| C | P | $\mathcal{E}$ | grace_weight = 125                  |
| C | P | $\mathcal{E}$ | alex_weight = 4 * grace_weight - 2  |
| C | P | $\mathcal{E}$ | answer = grace_weight + alex_weight |

[Predicted  $a_{12}$ ] 627.0 ✗

[ $R_{12}$ ] in Python

|   |   |               |                                                             |
|---|---|---------------|-------------------------------------------------------------|
| C | P | $\mathcal{E}$ | grace_weight = 125                                          |
| C | P | $\mathcal{E}$ | alex_weight = 2                                             |
| C | P | $\mathcal{E}$ | weight_multiplier = 4                                       |
| C | P | $\mathcal{E}$ | alex_total = alex_weight + weight_multiplier * grace_weight |
| C | P | $\mathcal{E}$ | answer = grace_weight + alex_total                          |

[ $Q_2$ ] **Mariah** and **grandma** used 1/4 and 1/2, respectively, from 364 yards in a skein of yarn. How many yards of yarn did they use in total?

[Ground-Truth  $a_2^*$ ] 273.0

[Predicted  $a_{21}$ ] 273.0 ✓

[ $R_{21}$ ] in Python

|   |   |               |                                         |
|---|---|---------------|-----------------------------------------|
| C | P | $\mathcal{E}$ | yards_per_skein = 364                   |
| C | P | $\mathcal{E}$ | mariah_yards = 1 / 4 * yards_per_skein  |
| C | P | $\mathcal{E}$ | grandma_yards = 1 / 2 * yards_per_skein |
| C | P | $\mathcal{E}$ | answer = mariah_yards + grandma_yards   |

[Predicted  $a_{22}$ ] 273.0 ✓

[ $R_{22}$ ] in Python

|   |   |               |                                            |
|---|---|---------------|--------------------------------------------|
| C | P | $\mathcal{E}$ | yarn_mariah = 1 / 4                        |
| C | P | $\mathcal{E}$ | yarn_grandma = 1 / 2                       |
| C | P | $\mathcal{E}$ | yards_per_skein = 364                      |
| C | P | $\mathcal{E}$ | total_yards = yarn_mariah + yarn_grandma   |
| C | P | $\mathcal{E}$ | yards_used = total_yards * yards_per_skein |
