# Supplementary material
Source: ML conference proceedings conference paper supplement (https://openreview.net/forum?id=Bw82hwg5Q3)
Supplement: supplementary_material [file attachment]

[Q<sub>3</sub>] Did **Columbus** obtain his **funding** from the rulers of the **Portuguese** Empire?

[Ground-Truth *a<sub>3</sub>\**] no

[Explanation] King Ferdinand and Queen Isabella **funded Columbus'** voyage. They were the joint rulers of the **Iberian Peninsula**, which included **Spain** but **excludes Portugal**. King John II of **Portugal** **rejected Columbus'** request for **funding**.

[Predicted *a<sub>32</sub>*] no ✓

[*R<sub>32</sub>*] in Chain-of-Thought

**Columbus was Italian and the Portuguese Empire was Portuguese.**

|          |                      |                                                                                                                                                                                                                                                                                                                       |
|----------|----------------------|-----------------------------------------------------------------------------------------------------------------------------------------------------------------------------------------------------------------------------------------------------------------------------------------------------------------------|
| <i>ε</i> | <i>C</i>             | correct                                                                                                                                                                                                                                                                                                               |
| <i>S</i> | <i>S<sub>1</sub></i> | The above step of reasoning is factually correct, as Columbus was indeed <b>Italian</b> and the <b>Portuguese</b> Empire was <b>Portuguese</b> . However, this step alone doesn't provide the complete answer to the question, which requires further reasoning.                                                      |
|          | <i>S<sub>2</sub></i> | Although the statement is correct in stating that Columbus was <b>Italian</b> and the <b>Portuguese</b> Empire was <b>Portuguese</b> , it doesn't directly address the question about the source of his funding. (The score is 0.6 because it provides some context but doesn't give a clear answer to the question.) |
|          | <i>S<sub>3</sub></i> | The statement accurately identifies the nationalities of Columbus and the <b>Portuguese</b> Empire. However, it does not directly address the funding question, which is why there is still some uncertainty.                                                                                                         |

**Thus, Columbus didn't obtain funding ... Portuguese Empire.**

|          |                      |                                                                                                                                                                                                                                                                                                                                                                                                                                                                                                                   |
|----------|----------------------|-------------------------------------------------------------------------------------------------------------------------------------------------------------------------------------------------------------------------------------------------------------------------------------------------------------------------------------------------------------------------------------------------------------------------------------------------------------------------------------------------------------------|
| <i>ε</i> | <i>C</i>             | Columbus was <b>Italian</b> , but obtained funding from the rulers of the <b>Spanish</b> Empire                                                                                                                                                                                                                                                                                                                                                                                                                   |
| <i>S</i> | <i>S<sub>1</sub></i> | The above step of reasoning is incorrect because it assumes that Columbus couldn't have received funding from the <b>Portuguese</b> Empire solely based on his <b>Italian</b> origin. However, the correct reasoning is that Columbus received funding from the <b>Spanish</b> monarchs, King Ferdinand II of Aragon and Queen Isabella I of Castile, rather than from the <b>Portuguese</b> Empire.                                                                                                              |
|          | <i>S<sub>2</sub></i> | The conclusion is incorrect because it is not based on the fact that Columbus was <b>Italian</b> and the <b>Portuguese</b> Empire was <b>Portuguese</b> . It is true that Columbus was <b>Italian</b> and the <b>Portuguese</b> Empire was <b>Portuguese</b> , but the conclusion should be based on the fact that Columbus obtained his funding from the rulers of <b>Spain</b> , not <b>Portugal</b> . The probability is 0.2 because the statement provides some context but leads to an incorrect conclusion. |
|          | <i>S<sub>3</sub></i> | Although the statement accurately identifies the nationalities of Columbus and the <b>Portuguese</b> Empire, it does not directly address the funding question. In fact, Columbus sought funding from the rulers of <b>Spain</b> , not <b>Portugal</b> , but the provided reasoning does not make this clear.                                                                                                                                                                                                     |

**So the answer is no.**

|          |                      |                                                                                                                                                                                                                                                                                                                                                                                                                                                                                                          |
|----------|----------------------|----------------------------------------------------------------------------------------------------------------------------------------------------------------------------------------------------------------------------------------------------------------------------------------------------------------------------------------------------------------------------------------------------------------------------------------------------------------------------------------------------------|
| <i>ε</i> | <i>C</i>             | Columbus was <b>Italian</b> , but obtained funding from the rulers of the <b>Spanish</b> Empire, not <b>Portuguese</b>                                                                                                                                                                                                                                                                                                                                                                                   |
| <i>S</i> | <i>S<sub>1</sub></i> | The above step of reasoning is incorrect because it assumes that Columbus couldn't have received funding from the <b>Portuguese</b> Empire solely based on his <b>Italian</b> origin. However, the correct reasoning is that Columbus received funding from the <b>Spanish</b> monarchs, King Ferdinand II of Aragon and Queen Isabella I of Castile, rather than from the <b>Portuguese</b> Empire.                                                                                                     |
|          | <i>S<sub>2</sub></i> | While the conclusion that Columbus did not obtain funding from the rulers of the <b>Portuguese</b> Empire is correct, the reasoning provided is not strong enough to support it. Columbus' nationality and the nationality of the <b>Portuguese</b> Empire are not relevant factors. The correct reasoning is that Columbus obtained funding from the rulers of <b>Spain</b> , not <b>Portugal</b> . The probability is 0.3 because the conclusion is accurate, but the reasoning leading to it is weak. |
|          | <i>S<sub>3</sub></i> | Although the statement accurately identifies the nationalities of Columbus and the <b>Portuguese</b> Empire, it does not directly address the funding question. In fact, Columbus sought funding from the rulers of <b>Spain</b> , not <b>Portugal</b> , but the provided reasoning does not make this clear.                                                                                                                                                                                            |
