# Supplementary material
Source: ML conference proceedings conference paper supplement (https://openreview.net/forum?id=Bw82hwg5Q3)
Supplement: supplementary_material [file attachment]

[Q<sub>4</sub>] Is Freya a combination of Athena and Aphrodite?  
[Ground-Truth  $a_4^*$ ] no  
[Explanation] Athena was the Greek goddess of war. Aphrodite was the Greek goddess of love. Freya was the Norse goddess of war, love, and fertility.

[Predicted  $a_{42}$ ] no  
[R<sub>42</sub>] in Chain-of-Thought

|   |   |   |                                                                             |                                                                                                                                                     |   |
|---|---|---|-----------------------------------------------------------------------------|-----------------------------------------------------------------------------------------------------------------------------------------------------|---|
| C | P | ε | Freya is the goddess of love, beauty and fertility.                         |                                                                                                                                                     | S |
| C | P | ε | You can compare these to the Greek gods Athena and Aphrodite, respectively. |                                                                                                                                                     | S |
|   |   |   | correct                                                                     | Aphrodite is indeed the Greek goddess of love and beauty, but Athena is the Greek goddess of wisdom, courage, and strategic warfare, not fertility. |   |
| C | P | ε | It is not clear how their powers exactly compare.                           |                                                                                                                                                     | S |
| C | P | ε | However, it seems that Freya must have attributes that match both gods.     |                                                                                                                                                     | S |
|   |   |   | correct                                                                     | Freya shares some attributes with Aphrodite, but the comparison to Athena is not fitting. Freya doesn't possess the same attributes as Athena.      |   |
| C | P | ε | So the answer is yes.                                                       |                                                                                                                                                     | S |
| C | P | ε | correct                                                                     | the conclusion is incorrect                                                                                                                         |   |
