# Supplementary material
Source: ML conference proceedings conference paper supplement (https://openreview.net/forum?id=Bw82hwg5Q3)
Supplement: supplementary_material [file attachment]

[Q<sub>1</sub>] **Grace** weighs **125** pounds. **Alex** weighs **2** pounds less than **4** times what **Grace** weighs. What are their **combined** weights in pounds?

[Ground-Truth  $a_1^*$ ] 623.0

[Predicted  $a_{12}$ ] 627.0 

[ $R_{12}$ ] in Python

|                                                             |       |                                                                                                                                                                                                                                                                                                                                                                                                                                      |
|-------------------------------------------------------------|-------|--------------------------------------------------------------------------------------------------------------------------------------------------------------------------------------------------------------------------------------------------------------------------------------------------------------------------------------------------------------------------------------------------------------------------------------|
| grace_weight = 125                                          |       |                                                                                                                                                                                                                                                                                                                                                                                                                                      |
| $\epsilon$                                                  | $C$   | correct                                                                                                                                                                                                                                                                                                                                                                                                                              |
| $S$                                                         | $S_1$ | correct                                                                                                                                                                                                                                                                                                                                                                                                                              |
|                                                             | $S_2$ | The line of code correctly assigns the given weight of Grace ( <b>125</b> pounds) to the variable <b>grace_weight</b>                                                                                                                                                                                                                                                                                                                |
|                                                             | $S_3$ | The given line of code correctly assigns the value of <b>125</b> to the variable <b>grace_weight</b> , representing Grace's weight in pounds.                                                                                                                                                                                                                                                                                        |
| alex_weight = 2                                             |       |                                                                                                                                                                                                                                                                                                                                                                                                                                      |
| $\epsilon$                                                  | $C$   | alex_weight should be calculated based on <b>grace_weight</b>                                                                                                                                                                                                                                                                                                                                                                        |
| $S$                                                         | $S_1$ | alex_weight should be calculated as <b>4</b> times <b>grace_weight</b> minus <b>2</b>                                                                                                                                                                                                                                                                                                                                                |
|                                                             | $S_2$ | The line of code defining <b>alex_weight</b> should be calculated as <b>4</b> times Grace's weight minus <b>2</b> , which is ( <b>4</b> * <b>grace_weight</b> ) - <b>2</b> .                                                                                                                                                                                                                                                         |
|                                                             | $S_3$ | The calculation for Alex's weight is not correct. It should be calculated as <b>4</b> * <b>grace_weight</b> - <b>2</b> .                                                                                                                                                                                                                                                                                                             |
| weight_multiplier = 4                                       |       |                                                                                                                                                                                                                                                                                                                                                                                                                                      |
| $\epsilon$                                                  | $C$   | correct                                                                                                                                                                                                                                                                                                                                                                                                                              |
| $S$                                                         | $S_1$ | The line of code is correct as it defines the multiplier for Alex's weight based on Grace's weight.                                                                                                                                                                                                                                                                                                                                  |
|                                                             | $S_2$ | Correct because it assigns the correct value ( <b>4</b> ) to the variable <b>weight_multiplier</b> , which represents the factor by which Grace's weight is multiplied to calculate Alex's weight.                                                                                                                                                                                                                                   |
|                                                             | $S_3$ | The code correctly assigns the value <b>4</b> to the variable <b>weight_multiplier</b> , which will be used in the calculation of Alex's weight.                                                                                                                                                                                                                                                                                     |
| alex_total = alex_weight + weight_multiplier * grace_weight |       |                                                                                                                                                                                                                                                                                                                                                                                                                                      |
| $\epsilon$                                                  | $C$   | correct formula to calculate <b>alex_total</b>                                                                                                                                                                                                                                                                                                                                                                                       |
| $S$                                                         | $S_1$ | The formula used to calculate Alex's weight is incorrect.                                                                                                                                                                                                                                                                                                                                                                            |
|                                                             | $S_2$ | The above line of code calculates Alex's weight correctly as <b>2</b> pounds less than <b>4</b> times Grace's weight ( <b>4</b> * <b>grace_weight</b> - <b>2</b> ).                                                                                                                                                                                                                                                                  |
|                                                             | $S_3$ | Alex weighs <b>2</b> pounds less than <b>4</b> times what Grace weighs, not <b>2</b> pounds more.                                                                                                                                                                                                                                                                                                                                    |
| answer = grace_weight + alex_total                          |       |                                                                                                                                                                                                                                                                                                                                                                                                                                      |
| $\epsilon$                                                  | $C$   | should be the sum of <b>grace_weight</b> and <b>alex_weight</b>                                                                                                                                                                                                                                                                                                                                                                      |
| $S$                                                         | $S_1$ | The code calculates Alex's weight correctly using the given relationship and adds it to Grace's weight to calculate the combined weight. <u>The only minor issue is the unnecessary use of the separate variable <b>alex_weight</b> which could directly be replaced with the calculation (<b>4</b> * <b>grace_weight</b> - <b>2</b>).</u> <u>However, this does not affect the correctness of the answer.</u>                       |
|                                                             | $S_2$ | The result variable holds the correct combined weight of Grace and Alex, and this line of code correctly calculates the value of <b>answer</b> .                                                                                                                                                                                                                                                                                     |
|                                                             | $S_3$ | The code above correctly calculates the total weight of Grace and Alex based on the given problem statement. <u>The only minor issue</u> is that the <b>alex_weight</b> variable is initialized as <b>2</b> , <u>which might be a bit confusing</u> . It would be better to directly calculate <b>alex_total</b> as ( <b>4</b> * <b>grace_weight</b> - <b>2</b> ), <u>but the current code does not produce an incorrect result.</u> |
