# Supplementary material
Source: ML conference proceedings conference paper supplement (https://openreview.net/forum?id=Bw82hwg5Q3)
Supplement: supplementary_material [file attachment]

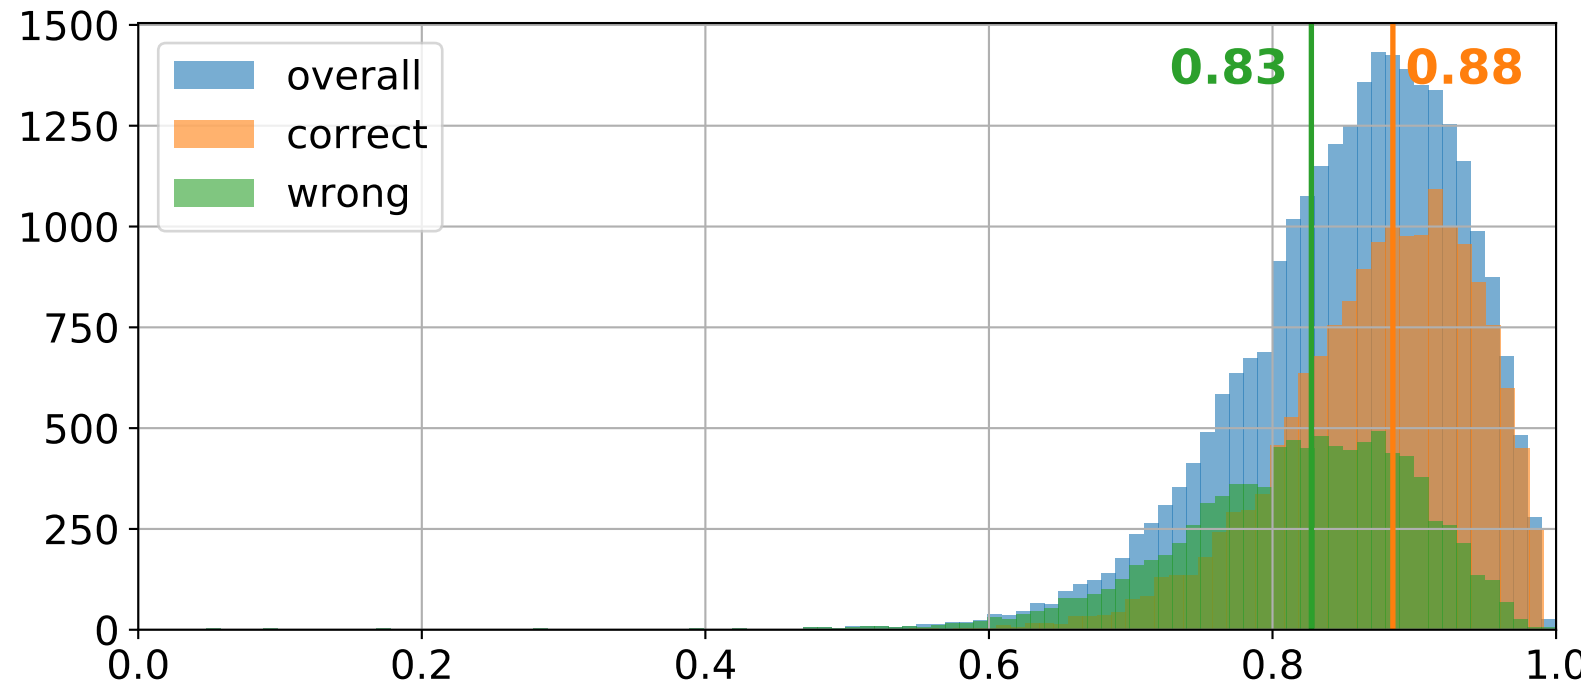

generation confidence  $\mathcal{P}$

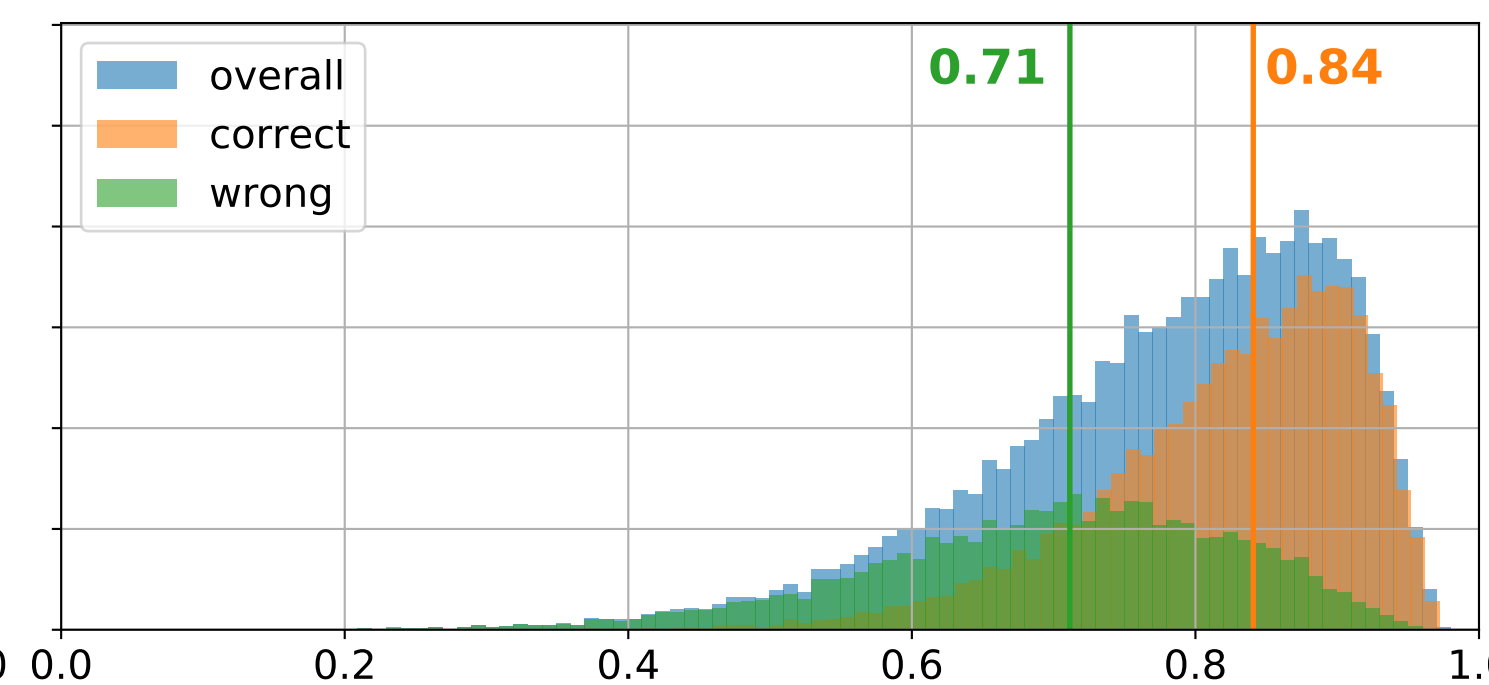

evaluation confidence  $\mathcal{C}$

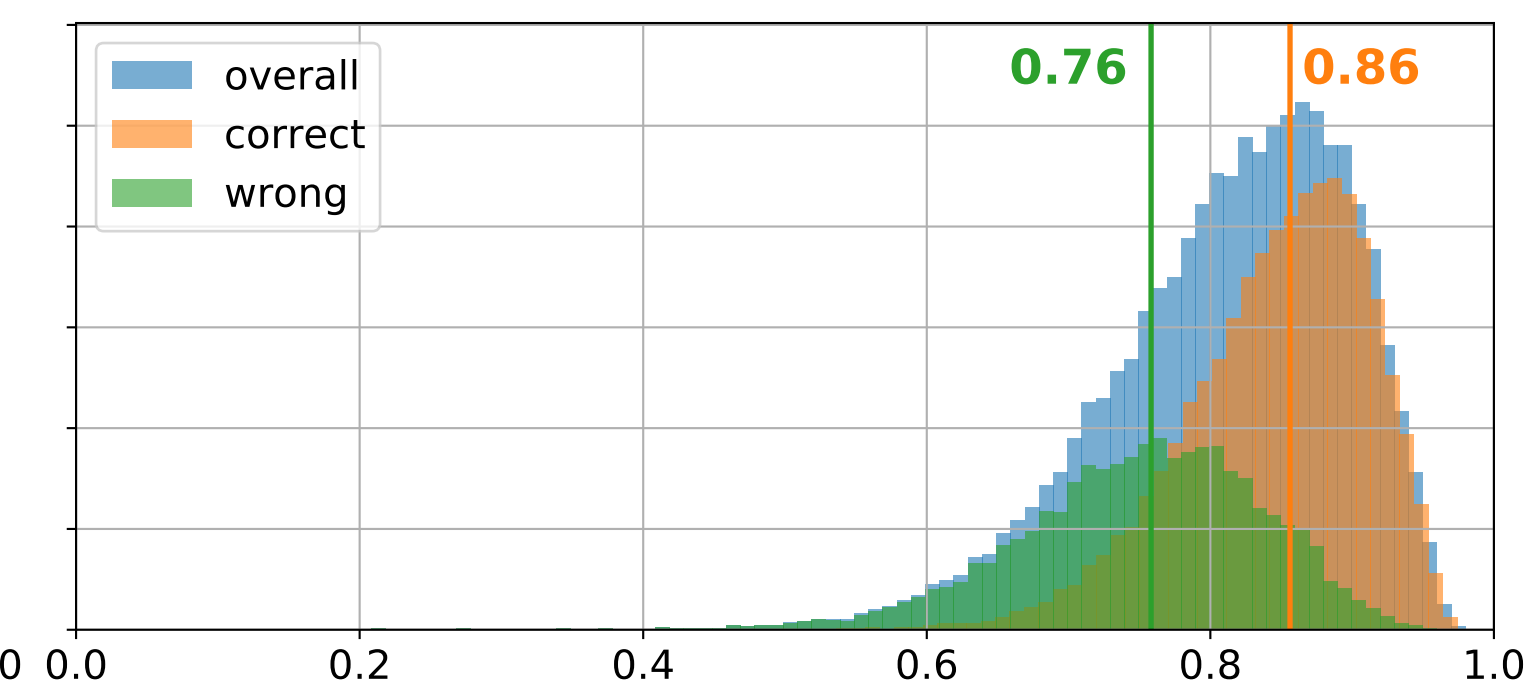

score  $\mathcal{E}_\lambda = \mathcal{C}^\lambda \cdot \mathcal{P}^{(1-\lambda)}, \lambda = 0.5$
